# Supplementary material for: Energetics and evasion dynamics of large predators and prey: pumas vs. hounds
Source: PeerJ journal article supplement (doi:10.7717/peerj.3701), 2017-08-17

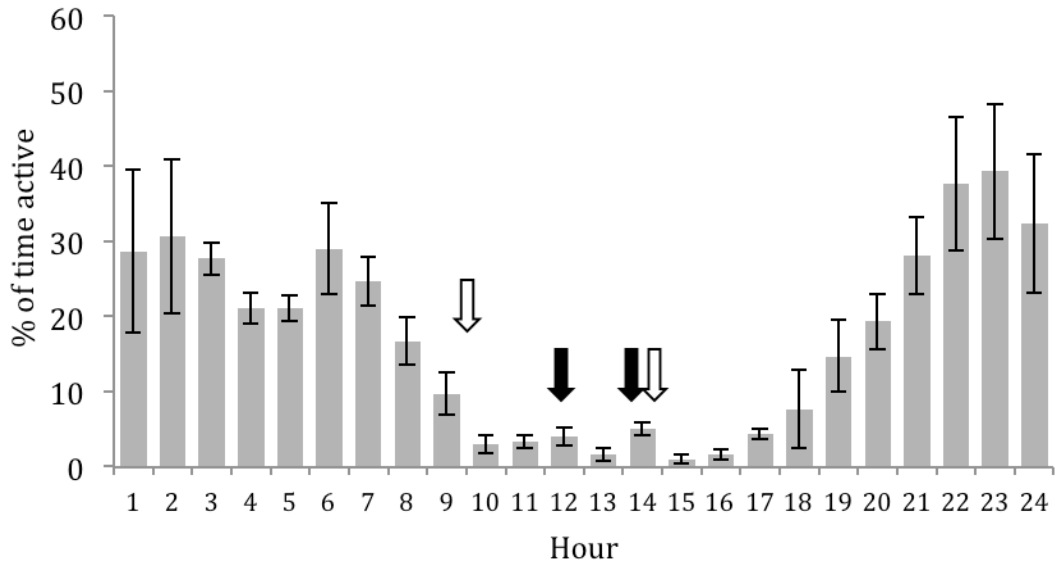

Supplement: Fig_S1.pdf [file Fig_S1.pdf]
