# Supplementary material for: Energetics and evasion dynamics of large predators and prey: pumas vs. hounds
Source: PeerJ journal article supplement (doi:10.7717/peerj.3701), 2017-08-17
Supplement: Fig_S2.pdf [file Fig_S2.pdf]

A.

**Chase 2**

Elevation profile for hound pursuit

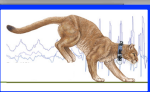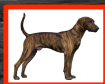

B.

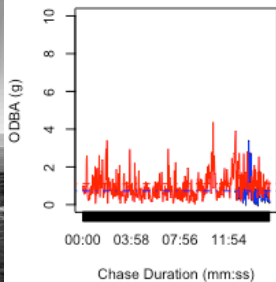

C.

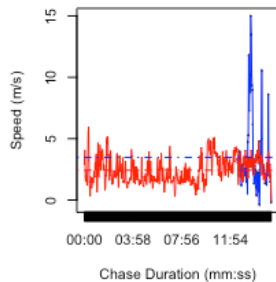

D.

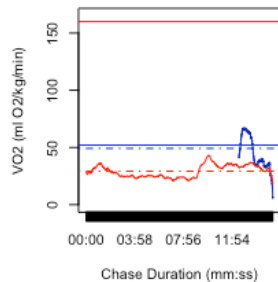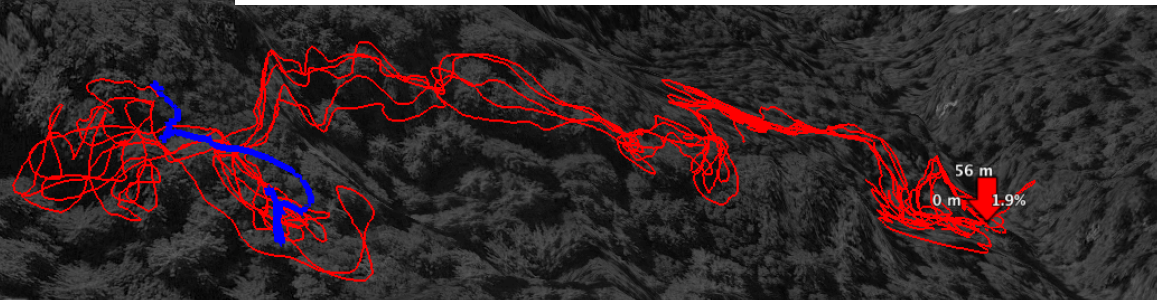

E.

Graph: Min, Avg, Max **Elevation: 54, 132, 203 m**

Range Totals: Distance: 1.39 km Elev Gain/Loss: 295 m, -151 m Max Slope: 93.3%, -90.6% Avg Slope: 30.1%, -25.0%

203 m

150 m

100 m

Google earth

Data CSUMB, SEMU, CALOPC

Biol Bio, NCA, NCA, Navy, NCA, OEBDO

Data MBAR 0 m

0.25 km

0.5 km

0.75 km

1 km

0.25 km

100 m
