# Supplementary material for: Energetics and evasion dynamics of large predators and prey: pumas vs. hounds
Source: PeerJ journal article supplement (doi:10.7717/peerj.3701), 2017-08-17
Supplement: Fig_S3.pdf [file Fig_S3.pdf]

A.

Chase 3 2015 11 pm  
Elevation profile for hound pursuit

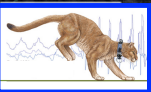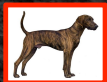

B.

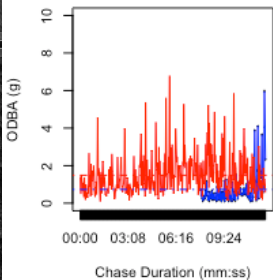

C.

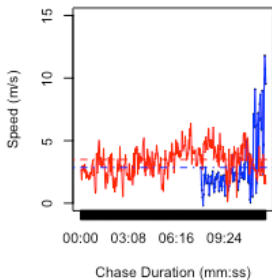

D.

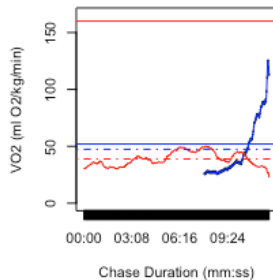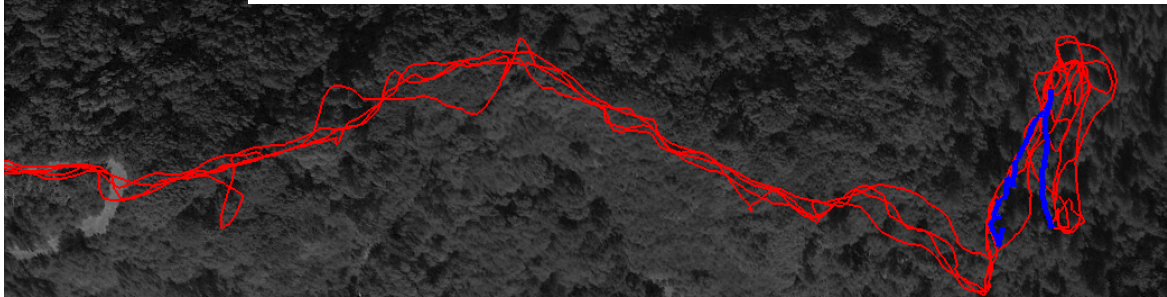

E.

Graph: Min, Avg, Max Elevation: 613, 725, 882 m

Range Totals: Distance: 1.12 km Elev Gain/Loss: 96 m, -336 m Max Slope: 73.4%, -81.5% Avg Slope: 34.8%, -35.7%

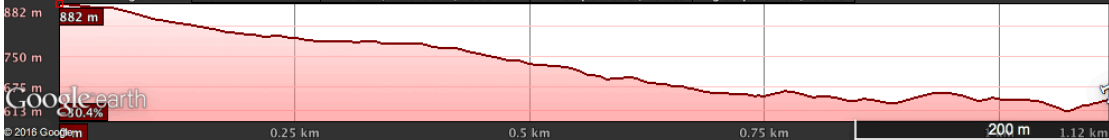

Google earth

© 2016 Google
