# Supplementary material for: Energetics and evasion dynamics of large predators and prey: pumas vs. hounds
Source: PeerJ journal article supplement (doi:10.7717/peerj.3701), 2017-08-17

A.

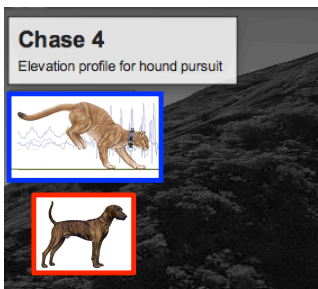

B.

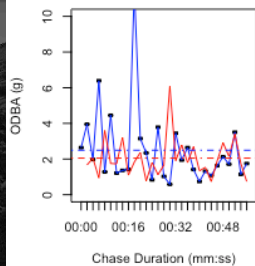

C.

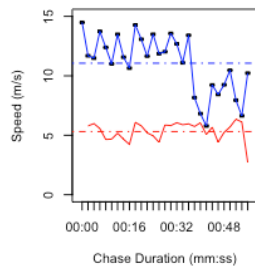

D.

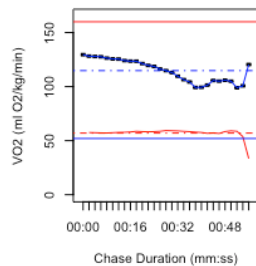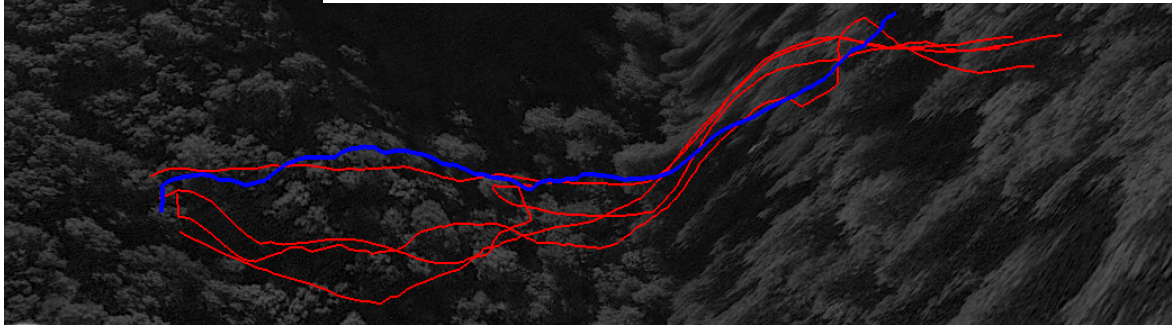

E.

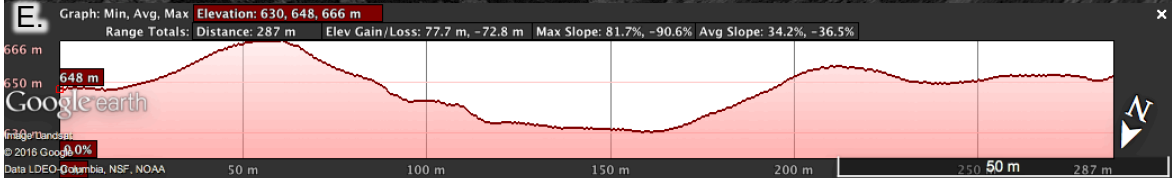

Supplement: Fig_S4.pdf [file Fig_S4.pdf]
